# Supplementary material for: Vegetarian and vegan diets and the risk of cardiovascular disease, ischemic heart disease and stroke: a systematic review and meta-analysis of prospective cohort studies
Source: PubMed Central journal article supplement (PMC9899747; doi:10.1007/s00394-022-02942-8), 2022-08-27
Supplement: 394_2022_2942_MOESM3_ESM.pdf [file 394_2022_2942_MOESM3_ESM.pdf]

### Online Resource 3

**Supplementary material to:** Vegetarian and vegan diets and the risk of cardiovascular disease, ischemic heart disease and stroke: a systematic review and meta-analysis of prospective cohort studies.

**Authors:** Jarle Sæby Dybvik<sup>1</sup>, Mette Svendsen<sup>2,3</sup> Dagfinn Aune<sup>3,4,5,6</sup>

#### Author affiliations

<sup>1</sup> Institute of Clinical Medicine, Faculty of Medicine, University of Oslo, Oslo, Norway

<sup>2</sup> Department of Nutrition Sciences, Institute of Basic Medical Sciences, University of Oslo, Oslo, Norway

<sup>3</sup> Department of Endocrinology, Morbid Obesity and Preventive Medicine, Oslo University Hospital, Oslo, Norway

<sup>4</sup> Department of Epidemiology and Biostatistics, School of Public Health, Imperial College London, London, United Kingdom

<sup>5</sup> Department of Nutrition, Oslo New University College, Oslo, Norway

<sup>6</sup> Unit of Cardiovascular and Nutritional Epidemiology, Institute of Environmental Medicine, Karolinska Institutet, Stockholm, Sweden

**Correspondence to:** Jarle Sæby Dybvik, Institute of Clinical Medicine, Faculty of Medicine, University of Oslo, Oslo, Norway. E-mail address: [j.s.dybvik@gmail.com](mailto:j.s.dybvik@gmail.com). Phone number: 0047 99162306

**Supplementary Table 4. Citations excluded after full-text assessment**

| <b>Exclusion criteria</b>                                      | <b>Reference number</b> |
|----------------------------------------------------------------|-------------------------|
| Case-control studies                                           | [1,2]                   |
| Cohort profiles                                                | [3,4]                   |
| Conference papers / abstracts                                  | [5-20]                  |
| Cross-sectional studies                                        | [21-26]                 |
| Duplicates                                                     | [27-39]                 |
| Letters / editorials / commentaries                            | [40-74]                 |
| Meta-analyses                                                  | [75-81]                 |
| No risk estimates / confidence intervals / not useable results | [82-87]                 |
| Not relevant exposure                                          | [88-187]                |
| Not relevant exposure / outcome                                | [188-196]               |
| Not relevant outcome                                           | [197-216]               |
| Retracted article                                              | [217]                   |
| Reviews                                                        | [218-319]               |
| Studies in subjects with diabetes                              | [320]                   |
| Studies in subjects with IHD or stroke                         | [321-344]               |
| Study protocol                                                 | [345]                   |

## Reference list of citations excluded after full-text assessment

1. Bhattacharjee M, Dalal PM, Vairale J, Shenoy A (2015) In hospital prospective stroke registry-risk factor survey. *Int J Stroke* 10:235. doi:<http://dx.doi.org/10.1111/ijvs.12479>
2. Pais P, Pogue J, Gerstein H, Zachariah E, Savitha D, Jayprakash S, Nayak PR, Yusuf S (1996) Risk factors for acute myocardial infarction in Indians: a case-control study. *Lancet* (London, England) 348 (9024):358-363. doi:10.1016/s0140-6736(96)02507-x
3. Butler TL, Fraser GE, Beeson WL, Knutsen SF, Herring RP, Chan J, Sabate J, Montgomery S, Haddad E, Preston-Martin S, Bennett H, Jaceldo-Siegl K (2008) Cohort profile: The Adventist Health Study-2 (AHS-2). *Int J Epidemiol* 37 (2):260-265. doi:<http://dx.doi.org/10.1093/ije/dym165>
4. Cade JE, Burley VJ, Greenwood DC, Group UKWsCSS (2004) The UK Women's Cohort Study: comparison of vegetarians, fish-eaters and meat-eaters. *Public Health Nutr* 7 (7):871-878. doi:10.1079/phn2004620
5. Mejia MA, Sanchez A, Sanchez J, Runte E (2016) A vegan diet rich in fats of plant origin may reverse Coronary artery disease. *FASEB Journal Conference: Experimental Biology 30 (Meeting Abstracts)*
6. Mangat A, Grewal D, Singh R, Jyotsna R, Kaur P, Pandian JD (2011) Dietary patterns in stroke patients in northwest India. *Cerebrovasc Dis* 32:27. doi:<http://dx.doi.org/10.1159/000333802>
7. Heskey C (2017) The contribution of plant-based dietary patterns to health and disease. *West Indian Med J* 66 (Supplement 3):31-32
8. Zyriax BC (2019) Longterm consequences of diet styles (vegetarian, vegan, low-carb ...). *Maturitas* 124:113. doi:<http://dx.doi.org/10.1016/j.maturitas.2019.04.012>
9. Sonja Smiljic V (2019) Lifestyles as risk for cardiovascular diseases in medical students. *Eur J Heart Fail* 21 (Supplement 1):145. doi:<http://dx.doi.org/10.1002/ejhf.1488>
10. Dinu M, Pagliai G, Casini A, Sofi F (2016) Vegetarian, vegan diets and multiple health outcomes: A systematic review with meta-analysis of observational studies. *Eur Heart J* 37 (suppl.1):191-598. doi:<http://dx.doi.org/10.1093/eurheartj/ehw432>
11. Appleby PN, Key TJ (2016) The long-term health of vegetarians and vegans. *The Proceedings of the Nutrition Society* 75 (3):287-293. doi:10.1017/S0029665115004334
12. Chhajer B, Singh V, Kumari G (2016) Development of a holistic model to prevent and reverse coronary artery disease: SAAOL (science and art of living) safety circle. *Cardiology (Switzerland)* 134 (Supplement 1):309. doi:<http://dx.doi.org/10.1159/000447505>
13. Orlich MJ, Fraser GE (2014) Vegetarian diets in the Adventist Health Study 2: a review of initial published findings. *The American journal of clinical nutrition* 100 Suppl 1 (1):353S-358S. doi:10.3945/ajcn.113.071233
14. Willett WC (1999) Convergence of philosophy and science: the third international congress on vegetarian nutrition. *The American journal of clinical nutrition* 70 (3 Suppl):434S-438S. doi:10.1093/ajcn/70.3.434s
15. Willett W (2003) Lessons from dietary studies in Adventists and questions for the future. *The American journal of clinical nutrition* 78 (3 Suppl):539S-543S. doi:10.1093/ajcn/78.3.539S
16. Knutsen SF (1994) Lifestyle and the use of health services. *Am J Clin Nutr* 59 (5 SUPPL.):1171S-1175S. doi:<http://dx.doi.org/10.1093/ajcn/59.5.1171S>
17. Crowe FL, Appleby PN, Travis RC, Key TJ (2012) Risk of ischaemic heart disease among British vegetarians and non-vegetarians: Results from the EPIC-Oxford cohort study. *Proceedings of the Nutrition Society Conference: Summer Meeting of the Nutrition Society Hosted by the Irish Section* 71 (OCE2):E203. doi:<http://dx.doi.org/10.1017/S0029665112002601>

18. Obersby D, Chappell DC, Tsiami AA (2012) Are vegetarians susceptible to primary cardiovascular disease, due to a lack or absence of dietary animal produce? *Proc Nutr Soc* 71 (OCE3):E241. doi:<http://dx.doi.org/10.1017/S0029665112003321>
19. O'Mullan A (2019) Can a wholefood plant-based diet affect healthy ageing? *Age and Ageing Conference: 67th Annual and Scientific Meeting of the Irish Gerontological Society, Innovation, Advances and Excellence in Ageing Ireland* 48 (Suppl 3):iii17–iii65. doi:<http://dx.doi.org/10.1093/ageing/afz103.38>
20. Oliveira ERA, Velten APC, Cade NV, De Oliveira CS (2013) Comparison of seventh day adventist mortality with a general population in the Espirito Santo state, Brazil. *Eur J Epidemiol* 28 (1):S204-S205. doi:<http://dx.doi.org/10.1007/s10654-013-9820-0>
21. Ponzio E, Mazzarini G, Gasperi G, Bottoni MC, Vallorani S (2015) The Vegetarian Habit in Italy: Prevalence and Characteristics of Consumers. *Ecol Food Nutr* 54 (4):370-379. doi:10.1080/03670244.2014.1001981
22. Yang S-Y, Li X-J, Zhang W, Liu C-Q, Zhang H-J, Lin J-R, Yan B, Yu Y-X, Shi X-L, Li C-D, Li W-H (2012) Chinese lacto-vegetarian diet exerts favorable effects on metabolic parameters, intima-media thickness, and cardiovascular risks in healthy men. *Nutrition in clinical practice : official publication of the American Society for Parenteral and Enteral Nutrition* 27 (3):392-398. doi:10.1177/0884533611436173
23. Löwik MR, Schrijver J, Odink J, van den Berg H, Wedel M (1990) Long-term effects of a vegetarian diet on the nutritional status of elderly people (Dutch Nutrition Surveillance System). *J Am Coll Nutr* 9 (6):600-609. doi:10.1080/07315724.1990.10720415
24. Kwok TK, Woo J, Ho S, Sham A (2000) Vegetarianism and ischemic heart disease in older Chinese women. *J Am Coll Nutr* 19 (5):622-627. doi:10.1080/07315724.2000.10718960
25. Gupta R (1996) Lifestyle risk factors and coronary heart disease prevalence in Indian men. *The Journal of the Association of Physicians of India* 44 (10):689-693
26. Kapoor D, Iqbal R, Singh K, Jaacks LM, Shivashankar R, Sudha V, Anjana RM, Kadir M, Mohan V, Ali MK, Narayan KM, Tandon N, Prabhakaran D, Merchant AT (2018) Association of dietary patterns and dietary diversity with cardiometabolic disease risk factors among adults in South Asia: The CARRS study. *Asia Pac J Clin Nutr* 27 (6):1332-1343. doi:[http://dx.doi.org/10.6133/apjcn.201811\\_27%286%29.0021](http://dx.doi.org/10.6133/apjcn.201811_27%286%29.0021)
27. Key TJ, Fraser GE, Thorogood M, Appleby PN, Beral V, Reeves G, Burr ML, Chang-Claude J, Frentzel-Beyme R, Kuzma JW, Mann J, McPherson K (1998) Mortality in vegetarians and non-vegetarians: a collaborative analysis of 8300 deaths among 76,000 men and women in five prospective studies. *Public Health Nutr* 1 (1):33-41. doi:10.1079/phn19980006
28. Frentzel-Beyme R, Claude J, Eilber U (1988) Mortality among German vegetarians: first results after five years of follow-up. *Nutr Cancer* 11 (2):117-126. doi:10.1080/01635588809513978
29. Chang-Claude J, Frentzel-Beyme R (1993) Dietary and lifestyle determinants of mortality among German vegetarians. *Int J Epidemiol* 22 (2):228-236. doi:10.1093/ije/22.2.228
30. Mann JI, Appleby PN, Key TJ, Thorogood M (1997) Dietary determinants of ischaemic heart disease in health conscious individuals. *Heart (British Cardiac Society)* 78 (5):450-455. doi:10.1136/hrt.78.5.450
31. Key TJ, Appleby PN, Davey GK, Allen NE, Spencer EA, Travis RC (2003) Mortality in British vegetarians: review and preliminary results from EPIC-Oxford. *The American journal of clinical nutrition* 78 (3 Suppl):533S-538S. doi:10.1093/ajcn/78.3.533S
32. Beeson WL, Mills PK, Phillips RL, Andress M, Fraser GE (1989) Chronic disease among Seventh-day Adventists, a low-risk group. Rationale, methodology, and description of

the population. *Cancer* 64 (3):570-581. doi:10.1002/1097-0142(19890801)64:3<570::aid-cncr2820640303>3.0.co;2-4

33. Crowe FL, Appleby PN, Travis RC, Key TJ (2013) Risk of hospitalization or death from ischemic heart disease among British vegetarians and nonvegetarians: results from the EPIC-Oxford cohort study. *The American journal of clinical nutrition* 97 (3):597-603. doi:10.3945/ajcn.112.044073
34. Key TJ, Thorogood M, Appleby PN, Burr ML (1996) Dietary habits and mortality in 11,000 vegetarians and health conscious people: results of a 17 year follow up. *BMJ (Clinical research ed)* 313 (7060):775-779. doi:10.1136/bmj.313.7060.775
35. Burr ML, Butland BK (1988) Heart disease in British vegetarians. *The American journal of clinical nutrition* 48 (3 Suppl):830-832. doi:10.1093/ajcn/48.3.830
36. Burr ML, Sweetnam PM (1982) Vegetarianism, dietary fiber, and mortality. *The American journal of clinical nutrition* 36 (5):873-877. doi:10.1093/ajcn/36.5.873
37. Key TJ, Appleby PN, Spencer EA, Travis RC, Roddam AW, Allen NE (2009) Mortality in British vegetarians: results from the European Prospective Investigation into Cancer and Nutrition (EPIC-Oxford). *The American journal of clinical nutrition* 89 (5):1613S-1619S. doi:10.3945/ajcn.2009.26736L
38. Thorogood M, Mann J, Appleby P, McPherson K (1994) Risk of death from cancer and ischaemic heart disease in meat and non-meat eaters. *BMJ (Clinical research ed)* 308 (6945):1667-1670. doi:10.1136/bmj.308.6945.1667
39. Phillips RL, Lemon FR, Beeson WL, Kuzma JW (1978) Coronary heart disease mortality among Seventh-Day Adventists with differing dietary habits: a preliminary report. *The American journal of clinical nutrition* 31 (10 Suppl):S191-S198. doi:10.1093/ajcn/31.10.S191
40. Mahase E (2019) Vegetarian and pescatarian diets are linked to lower risk of ischaemic heart disease, study finds. *BMJ (Clinical research ed)* 366: 15397. doi:10.1136/bmj.15397
41. Sievenpiper JL, Lavie CJ (2018) Dietary prevention of cardiovascular diseases. *Prog Cardiovasc Dis* 61 (1):1-2. doi:<http://dx.doi.org/10.1016/j.pcad.2018.05.001>
42. Stiefelhagen P (2013) [Meat free diet increases longevity in men]. [German] (*Fleischverzicht lasst Manner langer leben.*). *MMW Fortschritte der Medizin* 155 (12):7
43. Hauner H (2015) Vegetarian/vegan diet - reasonable or dangerous? (Für wen sinnvoll, für wen gefährlich?). *MMW Fortschritte der Medizin* 157 (10):41-43. doi:10.1007/s15006-015-3134-y
44. Shiwani AH, Aziz A, Shiwani MH (2007) Shall we become vegetarian to minimize the risk of coronary heart disease? *JPMMA The Journal of the Pakistan Medical Association* 57 (1):46-48
45. Esselstyn Jr CB (2007) Letters from the global literature: Unresolved issues and responses [4]. *MedGenMed Medscape General Medicine* 9 (3):57
46. Lamisse F (2013) Vegetarian diet. [French] (*L'alimentation vegetarienne.*). *Medecine des Maladies Metaboliques* 7 (2):109-113. doi:<http://dx.doi.org/10.1016/S1957-2557%2813%2970506-6>
47. Sargsyan VD, Safaryan AS, Kamyshova TV (2020) Ornish diet. Whole plant-based diet for cardiovascular disease prevention. [Russian]. *Profilakticheskaya Meditsina* 23 (6):114-119. doi:<http://dx.doi.org/10.17116/profmed202023061114>
48. Brom B (2009) Integrative approach to management of heart disease is heart disease reversible? *South African Family Practice* 51 (3):196-197. doi:<http://dx.doi.org/10.1080/20786204.2009.10873846>
49. Dauchet L, Jung YJ (2019) Association between vegetarian diets and chronic diseases: An epidemiological approach (Association entre regimes vegetariens et pathologies

- chroniques : une approche epidemiologique.). Cahiers de Nutrition et de Dietetique 54 (6):318-325. doi:<http://dx.doi.org/10.1016/j.cnd.2019.07.004>
50. Kwok CS, Mamas MA, Loke YK (2015) Vegetarian diets and Adventists. *Int J Cardiol* 190:383-383. doi:10.1016/j.ijcard.2015.03.392
  51. Spiller GA, Bruce B (1998) Vegan diets and cardiovascular health. *J Am Coll Nutr* 17 (5):407-408. doi:10.1080/07315724.1998.10718786
  52. Williams KA, Sr., Patel H (2017) Healthy Plant-Based Diet: What Does it Really Mean? *J Am Coll Cardiol* 70 (4):423-425. doi:10.1016/j.jacc.2017.06.006
  53. Ros E (2018) Editorial commentary: Plant-based diets: More than meets the eye. *Trends Cardiovasc Med* 28 (7):442-444. doi:<http://dx.doi.org/10.1016/j.tcm.2018.04.008>
  54. Spence JD, Tangney C (2020) Lower risk of stroke with a vegetarian diet. *Neurology* 94 (11):463-464. doi:10.1212/wnl.0000000000009092
  55. Hickner J (2014) Can a plant-based diet really reverse CAD? *J Fam Pract* 63 (9):490
  56. Silverstein DA (2014) Are these CAD study findings too good to be true? *The Journal of family practice* 63 (9):492-493
  57. Mann J (2009) Vegetarian diets. *BMJ (Online)* 339 (7720):525. doi:<http://dx.doi.org/10.1136/bmj.b2507>
  58. Lindbloom EJ (2009) Long-term benefits of a vegetarian diet. *Am Fam Physician* 79 (7):541-542
  59. Fraser G (2003) Commentary: Protection from stroke by eating animal foods? Surely not! *Int J Epidemiol* 32 (4):543-545. doi:10.1093/ije/dyg217
  60. Ellis FR, Sanders TA (1977) Angina and vegan diet. *Am Heart J* 93 (6):803-805. doi:10.1016/s0002-8703(77)80080-x
  61. Blankenhorn DH (1985) Two new diet-heart studies. *The New England journal of medicine* 312 (13):851-853. doi:10.1056/NEJM198503283121309
  62. Sullivan JL (1983) Vegetarianism, ischemic heart disease, and iron. *The American journal of clinical nutrition* 37 (5):882-883. doi:10.1093/ajcn/37.5.882
  63. Ornish D (2009) Mostly plants. *The American journal of cardiology* 104 (7):957-958. doi:10.1016/j.amjcard.2009.05.031
  64. Fields H, Millstine D, Agrwal N (2014) Just plants? Impact of a vegetarian diet on mortality. *J Womens Health (Larchmt)* 23 (11):987-988. doi:10.1089/jwh.2014.4972
  65. Fenton T, Gillis C (2019) Plant-based diets do not prevent most chronic diseases. *Crit Rev Food Sci Nutr* 59 (7):1044-1045. doi:10.1080/10408398.2017.1389692
  66. Estruch R, Sacanella E, Ros E (2021) Should we all go pesco-vegetarian? *Eur Heart J* 42 (12):1144-1146. doi:10.1093/eurheartj/ehaa1088
  67. Ellis FR, Sanders T (1976) Letter: Angina and vegetarian diet. *Lancet (London, England)* 1 (7970):1190-1190. doi:10.1016/s0140-6736(76)91589-0
  68. Siguel E, MacBeath BR, Lerman RH, Gould KL, Ornish D (1996) Very low-fat diets for coronary heart disease: Perhaps, but which one? *J Am Med Assoc* 275 (18):1402-1403. doi:<http://dx.doi.org/10.1001/jama.275.18.1402>
  69. Taylor J (2013) Vegetarian diet cuts risk of heart disease by one-third. *Eur Heart J* 34 (21):1531-1531
  70. Rajaram S, Sabate J (2009) *American Journal of Clinical Nutrition: Preface*. *Am J Clin Nutr* 89 (5):1541S-1542S. doi:<http://dx.doi.org/10.3945/ajcn.2009.26736A>
  71. Vandembroucke JP (1994) Should you eat meat, or are you confounded by methodological debate? *BMJ (Clinical research ed)* 308 (6945):1671-1671. doi:10.1136/bmj.308.6945.1671
  72. Da Graca S (2019) Revue médicale suisse (Risque accru d'AVC chez les vegetariens et vegans ?.). *Rev Med Suisse* 15 (675):2308



73. Ha V, de Souza RJ (2015) "Fleshing Out" the Benefits of Adopting a Vegetarian Diet. *Journal of the American Heart Association* 4 (10):e002654-e002654. doi:10.1161/JAHA.115.002654
74. Lawrence MA, McNaughton SA (2019) Vegetarian diets and health. *BMJ (Clinical research ed)* 366:l5272. doi:10.1136/bmj.l5272
75. Chareonrungrueangchai K, Wongkawinwoot K, Anothaisintawee T, Reutrakul S (2020) Dietary Factors and Risks of Cardiovascular Diseases: An Umbrella Review. *Nutrients* 12 (4): 1088. doi:10.3390/nu12041088
76. Jafari S, Hezaveh E, Jalilpiran Y, Jayedi A, Wong A, Safaiyan A, Barzegar A (2021) Plant-based diets and risk of disease mortality: a systematic review and meta-analysis of cohort studies. *Crit Rev Food Sci Nutr*:1-13. doi:10.1080/10408398.2021.1918628
77. Glenn AJ, Vigiuliouk E, Seider M, Boucher BA, Khan TA, Blanco Mejia S, Jenkins DJA, Kahleová H, Rahelić D, Salas-Salvadó J, Kendall CWC, Sievenpiper JL (2019) Relation of Vegetarian Dietary Patterns With Major Cardiovascular Outcomes: A Systematic Review and Meta-Analysis of Prospective Cohort Studies. *Front Nutr* 6:80. doi:10.3389/fnut.2019.00080
78. Huang T, Yang B, Zheng J, Li G, Wahlqvist ML, Li D (2012) Cardiovascular disease mortality and cancer incidence in vegetarians: a meta-analysis and systematic review. *Ann Nutr Metab* 60 (4):233-240. doi:10.1159/000337301
79. Kwok CS, Umar S, Myint PK, Mamas MA, Loke YK (2014) Vegetarian diet, Seventh Day Adventists and risk of cardiovascular mortality: a systematic review and meta-analysis. *Int J Cardiol* 176 (3):680-686. doi:10.1016/j.ijcard.2014.07.080
80. Oussalah A, Levy J, Berthezène C, Alpers DH, Guéant JL (2020) Health outcomes associated with vegetarian diets: An umbrella review of systematic reviews and meta-analyses. *Clin Nutr* 39 (11):3283-3307. doi:10.1016/j.clnu.2020.02.037
81. Dinu M, Abbate R, Gensini GF, Casini A, Sofi F (2017) Vegetarian, vegan diets and multiple health outcomes: A systematic review with meta-analysis of observational studies. *Crit Rev Food Sci Nutr* 57 (17):3640-3649. doi:10.1080/10408398.2016.1138447
82. Fraser GE (2005) A comparison of first event coronary heart disease rates in two contrasting California populations. *J Nutr Health Aging* 9 (1):53-58
83. Kinlen LJ, Hermon C, Smith PG (1983) A proportionate study of cancer mortality among members of a vegetarian society. *Br J Cancer* 48 (3):355-361. doi:10.1038/bjc.1983.200
84. Chang-Claude J, Frentzel-Beyme R, Eilber U (1992) Mortality pattern of German vegetarians after 11 years of follow-up. *Epidemiology (Cambridge, Mass)* 3 (5):395-401. doi:10.1097/00001648-199209000-00003
85. Snowdon DA (1988) Animal product consumption and mortality because of all causes combined, coronary heart disease, stroke, diabetes, and cancer in Seventh-day Adventists. *The American journal of clinical nutrition* 48 (3 Suppl):739-748. doi:10.1093/ajcn/48.3.739
86. Chen C, Chaudhary A, Mathys A (2019) Dietary change scenarios and implications for environmental, nutrition, human health and economic dimensions of food sustainability. *Nutrients* 11 (4):856. doi:<http://dx.doi.org/10.3390/nu11040856>
87. Fraser GE, Shavlik DJ (1997) Risk factors for all-cause and coronary heart disease mortality in the oldest-old. The Adventist Health Study. *Arch Intern Med* 157 (19):2249-2258
88. Alshahrani SM, Fraser GE, Sabaté J, Knutsen R, Shavlik D, Mashchak A, Lloren JI, Orlich MJ (2019) Red and Processed Meat and Mortality in a Low Meat Intake Population. *Nutrients* 11 (3):622. doi:10.3390/nu11030622

89. Aston LM, Smith JN, Powles JW (2012) Impact of a reduced red and processed meat dietary pattern on disease risks and greenhouse gas emissions in the UK: a modelling study. *BMJ Open* 2 (5):e001072. doi:10.1136/bmjopen-2012-001072
90. Baden MY, Liu G, Satija A, Li Y, Sun Q, Fung TT, Rimm EB, Willett WC, Hu FB, Bhupathiraju SN (2019) Association of changes in plant-based diet indices with total and cause-specific mortality [abstract]. *Circulation Conference: American Heart Association's Epidemiology and Prevention/Lifestyle and Cardiometabolic Health* 139 (Supplement 1):AMP38. doi:[http://dx.doi.org/10.1161/circ.139.suppl\\_1.MP38](http://dx.doi.org/10.1161/circ.139.suppl_1.MP38)
91. Baden MY, Liu G, Satija A, Li Y, Sun Q, Fung TT, Rimm EB, Willett WC, Hu FB, Bhupathiraju SN (2019) Changes in Plant-Based Diet Quality and Total and Cause-Specific Mortality. *Circulation* 140 (12): 979-991. doi:10.1161/CIRCULATIONAHA.119.041014
92. Beckman JA, Shibao CA (2020) Trimethylamine-N-Oxide, More Red Meat for the Vascular Scientists. *Hypertension* 76 (1):40-41. doi:<http://dx.doi.org/10.1161/HYPERTENSIONAHA.120.14857>
93. Beilin LJ (1992) Strategies and difficulties in dietary intervention in myocardial infarction patients. *Clinical and experimental hypertension Part A, Theory and practice* 14 (1-2):213-221. doi:10.3109/10641969209036183
94. Berkel J, de Waard F (1983) Mortality pattern and life expectancy of Seventh-Day Adventists in the Netherlands. *Int J Epidemiol* 12 (4):455-459. doi:10.1093/ije/12.4.455
95. Böni R (2016) What is the Optimal Nutrition for Humans? (Was ist die optimale Ernährung für den Menschen?). *Praxis* 105 (9):517-521. doi:10.1024/1661-8157/a002348
96. Campbell TC (2017) A plant-based diet and animal protein: Questioning dietary fat and considering animal protein as the main cause of heart disease. *Journal of Geriatric Cardiology* 14 (5):331-337. doi:<http://dx.doi.org/10.11909/j.issn.1671-5411.2017.05.011>
97. Cena H, Calder PC (2020) Defining a healthy diet: Evidence for the role of contemporary dietary patterns in health and disease. *Nutrients* 12 (2):334. doi:<http://dx.doi.org/10.3390/nu12020334>
98. Christiansen NS, Schmidt AW, Johansen C, Ross L, Hvidt NC, Thygesen LC (2015) Risk for cardiovascular disease among Seventh-day Adventists and Baptists in Denmark, 1977-2009. *Int J Cardiol* 185: 133-135. doi:10.1016/j.ijcard.2015.03.131
99. Da Rosa EM, Scatola RP, Possa R (2008) Cardiovascular risk in vegetarians and omnivores: A comparative study. [Portuguese, English] (Risco cardiovascular em vegetarianos e onívoros: Um estudo comparativo.). *Arq Bras Cardiol* 91 (4):287. doi:<http://dx.doi.org/10.1590/S0066-782X2008001600013>
100. Farad-Bensenouci S, Lamisse F (1997) Vegetarian diet, hypertension and coronary heart disease. [French] (Alimentation végétarienne et maladies cardiovasculaires.). *Cahiers de Nutrition et de Diététique* 32 (4):261-266
101. Fønnebø V (1985) The Tromsø Heart Study: coronary risk factors in Seventh-Day Adventists. *Am J Epidemiol* 122 (5):789-793. doi:10.1093/oxfordjournals.aje.a114162
102. Fønnebø V (1992) Mortality in Norwegian Seventh-Day Adventists 1962-1986. *J Clin Epidemiol* 45 (2):157-167. doi:10.1016/0895-4356(92)90008-b
103. Fønnebø V (1994) The healthy Seventh-Day Adventist lifestyle: what is the Norwegian experience? *The American journal of clinical nutrition* 59 (5 Suppl):1124S-1129S. doi:10.1093/ajcn/59.5.1124S
104. Foscolou A, Critselis E, Tyrovolas S, Chrysohoou C, Rallidis L, Matalas AL, Sidossis LS, Panagiotakos D (2020) Plant and animal protein consumption, cardiometabolic risk and healthy aging: Attica and medis epidemiological studies. *Atherosclerosis* 315:e100-e101. doi:<http://dx.doi.org/10.1016/j.atherosclerosis.2020.10.310>



105. Fraser GE, Sabaté J, Beeson WL (1993) The application of results of some studies of California Seventh-Day Adventists to the general population. *Arch Intern Med* 153 (4):533-534
106. Fraser GE, Sabaté J, Beeson WL, Strahan TM (1992) A possible protective effect of nut consumption on risk of coronary heart disease. The Adventist Health Study. *Arch Intern Med* 152 (7):1416-1424
107. Fraser GE, Strahan TM, Sabaté J, Beeson WL, Kissinger D (1992) Effects of traditional coronary risk factors on rates of incident coronary events in a low-risk population. The Adventist Health Study. *Circulation* 86 (2):406-413. doi:10.1161/01.cir.86.2.406
108. Fresán U, Martínez-González MA, Sabaté J, Bes-Rastrollo M (2019) Global sustainability (health, environment and monetary costs) of three dietary patterns: results from a Spanish cohort (the SUN project). *BMJ Open* 9 (2):e021541-e021541. doi:10.1136/bmjopen-2018-021541
109. Ha B (2019) The Power of Plants: Is a Whole-Foods, Plant-Based Diet the Answer to Health, Health Care, and Physician Wellness? *Perm J* 23: 19-003. doi:10.7812/tpp/19.003
110. Halvorsen BA, Vellar OD, Svendsen B (1985) Cancer and cardiovascular mortality rates among Seventh-day adventists. Are reduced rates effect of better lifestyle?. [Norwegian]. *Tidsskr Nor Laegeforen* 105 (24):1620-1625+1630
111. Halvorsen BA, Vellar OD, Svendsen B (1985) Reduced mortality of cancer and cardiovascular diseases among Seventh Day Adventists. Health benefits of better life style? (Lavere dødelighet av kreft og hjerte- og karsykdommer hos adventister. Helsegevinster ved bedre livsstil?). *Tidsskrift for den Norske laegeforening : tidsskrift for praktisk medicin, ny række* 105 (24):1620-1625
112. Heianza Y, Zhou T, Sun D, Hu FB, Manson JE, Qi L (2020) Genetic susceptibility, plant-based dietary patterns, and risk of cardiovascular disease. *Am J Clin Nutr* 112 (1):220-228. doi:<http://dx.doi.org/10.1093/ajcn/nqaa107>
113. Heianza Y, Zhou T, Sun D, Hu FB, Qi L (2021) Healthful plant-based dietary patterns, genetic risk of obesity, and cardiovascular risk in the UK biobank study. *Clin Nutr* 40 (7):4694-4701. doi:<http://dx.doi.org/10.1016/j.clnu.2021.06.018>
114. Heianza Y, Zhou T, Sun D, Qi L (2019) Genetic predisposition to obesity and healthful plant-based diet in risks of hypertension and cardiovascular disease: Gene-diet interaction analyses in the UK biobank. *Circulation Conference: American Heart Association's Epidemiology and Prevention/Lifestyle and Cardiometabolic Health* 139 (Supplement 1):AMP05. doi:[http://dx.doi.org/10.1161/circ.139.suppl\\_1.MP05](http://dx.doi.org/10.1161/circ.139.suppl_1.MP05)
115. Heidemann C, Schulze MB, Franco OH, Van Dam RM, Mantzoros CS, Hu FB (2008) Dietary patterns and risk of mortality from cardiovascular disease, cancer, and all causes in a prospective cohort of women. *Circulation* 118 (3):230-237. doi:<http://dx.doi.org/10.1161/CIRCULATIONAHA.108.771881>
116. Hirayama T (1985) Mortality in Japanese with life-styles similar to Seventh-Day Adventists: strategy for risk reduction by life-style modification. *National Cancer Institute monograph* 69:143-153
117. Hoffmann K, Zyriax B-C, Boeing H, Windler E (2004) A dietary pattern derived to explain biomarker variation is strongly associated with the risk of coronary artery disease. *The American journal of clinical nutrition* 80 (3):633-640. doi:10.1093/ajcn/80.3.633
118. Karagodin VP, Sukhorukov VN, Orekhov AN, Yet SF, Sobenin IA (2020) Atherosclerosis prevention: the role of special diets and functional food. *Front Biosci (Elite Ed)* 12:95-101. doi:10.2741/e859
119. Kim H, Caulfield LE, Garcia-Larsen V, Steffen LM, Coresh J, Rebholz CM (2019) Plant-Based Diets Are Associated With a Lower Risk of Incident Cardiovascular Disease, Cardiovascular Disease Mortality, and All-Cause Mortality in a General Population of

- Middle-Aged Adults. *Journal of the American Heart Association* 8 (16): e012865.  
doi:<http://dx.doi.org/10.1161/JAHA.119.012865>
120. Kim H, Caulfield LE, Garcia-Larsen V, Steffen LM, Coresh J, Rebholz CM (2019) Plant-based diets are associated with a lower risk of cardiovascular disease, cardiovascular disease mortality, and all-cause mortality. *Circulation Conference: American Heart Association's Epidemiology and Prevention/Lifestyle and Cardiometabolic Health* 139 (Supplement 1):216. doi:[http://dx.doi.org/10.1161/circ.139.suppl\\_1.P216](http://dx.doi.org/10.1161/circ.139.suppl_1.P216)
121. Kim H, Caulfield LE, Garcia-Larsen V, Steffen LM, Coresh J, Rebholz CM (2019) Plant-Based Diets Are Associated With a Lower Risk of Incident Cardiovascular Disease, Cardiovascular Disease Mortality, and All-Cause Mortality in a General Population of Middle-Aged Adults. *J Am Heart Assoc* 8 (16):e012865. doi:10.1161/jaha.119.012865
122. Kim H, Caulfield LE, Rebholz CM (2018) Healthy Plant-Based Diets Are Associated with Lower Risk of All-Cause Mortality in US Adults. *The Journal of nutrition* 148 (4):624-631. doi:10.1093/jn/nxy019
123. Kim K (2019) Semi-vegetarians' body fat indices, metabolic risks and cardiovascular disease in Koreans. *Obesity Facts* 12 (Supplement 1):153.  
doi:<http://dx.doi.org/10.1159/000489691>
124. Kugelberg E (2013) Nutrition: Red meat consumption leads to a microbiota-dependent risk of cardiovascular disease. *Nature Reviews Endocrinology* 9 (7):378.  
doi:<http://dx.doi.org/10.1038/nrendo.2013.90>
125. Lamise F (2006) Is it necessary to be a 7th day Adventist for a good health?. [French] (Faut-il être Adventiste du 7<sup>e</sup> jour pour être en bonne santé?). *Cahiers de Nutrition et de Diététique* 41 (6):347-351
126. Lassale C, Beulens J, Van Der Schouw Y, Roswall N, Weiderpass E, Romaguera D, Riboli E, Tzoulaki I (2015) A pro-vegetarian food pattern and cardiovascular mortality in the epic study. *Circulation Conference: American Heart Association's Epidemiology and Prevention/Lifestyle and Cardiometabolic Health* 131 (SUPPL. 1):A16
127. Lerman RH (2010) The macrobiotic diet in chronic disease. *Nutrition in clinical practice : official publication of the American Society for Parenteral and Enteral Nutrition* 25 (6):621-626. doi:10.1177/0884533610385704
128. Lichtenstein AH, Van Horn L (1998) Very low fat diets. *Circulation* 98 (9):935-939. doi:10.1161/01.cir.98.9.935
129. Lockheart MSK, Steffen LM, Rebnord HM, Fimreite RL, Ringstad J, Thelle DS, Pedersen JI, Jacobs DR, Jr. (2007) Dietary patterns, food groups and myocardial infarction: a case-control study. *The British journal of nutrition* 98 (2):380-387.  
doi:10.1017/S0007114507701654
130. Mangat I (2009) Do vegetarians have to eat fish for optimal cardiovascular protection? *The American journal of clinical nutrition* 89 (5):1597S-1601S.  
doi:10.3945/ajcn.2009.26736I
131. Martínez-González MA, Sánchez-Tainta A, Corella D, Salas-Salvadó J, Ros E, Arós F, Gómez-Gracia E, Fiol M, Lamuela-Raventós RM, Schröder H, Lapetra J, Serra-Majem L, Pinto X, Ruiz-Gutierrez V, Estruch R, Group P (2014) A provegetarian food pattern and reduction in total mortality in the Prevención con Dieta Mediterránea (PREDIMED) study. *The American journal of clinical nutrition* 100 Suppl 1:320S-328S.  
doi:10.3945/ajcn.113.071431
132. McCarty MF (2004) A taurine-supplemented vegan diet may blunt the contribution of neutrophil activation to acute coronary events. *Med Hypotheses* 63 (3):419-425.  
doi:10.1016/j.mehy.2004.03.040

133. Mendoza-Vasconez AS, Landry MJ, Crimarco A, Bladier C, Gardner CD (2021) Sustainable Diets for Cardiovascular Disease Prevention and Management. *Current Atherosclerosis Reports* 23 (7):31. doi:<http://dx.doi.org/10.1007/s11883-021-00929-0>
134. Michgelsen J, Boateng D, Meeks KAC, Beune E, Addo J, Bahendeka S, Stronks K, Agyemang C (2021) Association between practising religion and cardiovascular disease risk among Ghanaian non-migrants and migrants in Europe: The rodam study. *Int J Environ Res Public Health* 18 (5):1-14. doi:<http://dx.doi.org/10.3390/ijerph18052451>
135. Modi GK (2010) Masala. *Natl Med J India* 23 (4):255
136. Montgomery S, Herring P, Yancey A, Beeson L, Butler T, Knutsen S, Sabate J, Chan J, Preston-Martin S, Fraser G (2007) Comparing self-reported disease outcomes, diet, and lifestyles in a national cohort of black and white Seventh-day Adventists. *Prev Chronic Dis* 4 (3):A62-A62
137. Morin É, Michaud-Létourneau I, Couturier Y, Roy M (2019) A whole-food, plant-based nutrition program: Evaluation of cardiovascular outcomes and exploration of food choices determinants. *Nutrition* 66:54-61. doi:10.1016/j.nut.2019.03.020
138. Murphy FG, Blumenthal DS, Dickson-Smith J, Peay RP (1990) The mortality profile of black Seventh-Day Adventists residing in metropolitan Atlanta: a pilot study. *Am J Public Health* 80 (8): 984–985. doi:10.2105/ajph.80.8.984
139. Naghipour S, Cox AJ, Peart JN, Du Toit EF, Headrick JP (2021) Trimethylamine N-oxide: heart of the microbiota-CVD nexus? *Nutr Res Rev* 34 (1):125-146. doi:10.1017/s0954422420000177
140. Navarro JA, Caramelli B (2010) Vegetarians from latin america. *The American journal of cardiology* 105 (6):902-902. doi:10.1016/j.amjcard.2009.10.031
141. Ness AR, Powles JW (2014) The role of diet, fruit and vegetables and antioxidants in the Aetiology of stroke. *European Journal of Preventive Cardiology* 6 (4):229-234. doi:<http://dx.doi.org/10.1177/204748739900600407>
142. Ness AR, Powles JW, Morgan JF, Key TJA, Appleby PN (1997) Dietary habits and mortality in vegetarians and health conscious people (multiple letters) [9]. *Br Med J* 314 (7074):148-149
143. Niveditha AS, Premavathy D (2019) Prevalence of heart disease among non-vegetarian individuals. *Drug Invention Today* 12 (6):1250-1253
144. Oliveira ERA, Cade NV, Velten APC, Silva GAE, Faerstein E (2016) Comparative study of cardiovascular and cancer mortality of Adventists and non-Adventists from Espírito Santo State, in the period from 2003 to 2009 (Estudo comparativo da mortalidade cardiovascular e por neoplasia de Adventistas e Não Adventistas do Estado do Espírito Santo, no período de 2003 a 2009). *Rev Bras Epidemiol* 19 (1):112-121. doi:10.1590/1980-5497201600010010
145. Palmer BF, Clegg DJ (2019) Cardiovascular Benefits of a Diet Enriched in Fruits and Vegetables. *Am J Nephrol* 49 (6):435-437. doi:<http://dx.doi.org/10.1159/000500044>
146. Pawlak R (2015) Is vitamin B12 deficiency a risk factor for cardiovascular disease in vegetarians? *Am J Prev Med* 48 (6):e11-e26. doi:10.1016/j.amepre.2015.02.009
147. Phillips RL, Kuzma JW, Beeson WL, Lotz T (1980) Influence of selection versus lifestyle on risk of fatal cancer and cardiovascular disease among Seventh-day Adventists. *Am J Epidemiol* 112 (2):296-314. doi:10.1093/oxfordjournals.aje.a112996
148. Rao V, Al-Weshahy A (2008) Plant-based diets and control of lipids and coronary heart disease risk. *Current atherosclerosis reports* 10 (6):478-485. doi:10.1007/s11883-008-0075-2
149. Raposo S, Satija A, Forman J, Li S, Mukamal K, Lof M, Manson J, Hu F, Rimm E (2019) Diet quality and incidence of coronary heart disease and coronary revascularization among US women and men with hypertension. *Circulation Conference: American Heart*

Association's Epidemiology and Prevention/Lifestyle and Cardiometabolic Health 139 (Suppl. 1):221. doi:[http://dx.doi.org/10.1161/circ.139.suppl\\_1.P221](http://dx.doi.org/10.1161/circ.139.suppl_1.P221)

150. Rathod KS, Velmurugan S, Ahluwalia A (2016) A 'green' diet-based approach to cardiovascular health? Is inorganic nitrate the answer? *Mol Nutr Food Res* 60 (1): 185-202. doi:10.1002/mnfr.201500313

151. Rohrmann S, Overvad K, Bueno-de-Mesquita HB, Jakobsen MU, Egeberg R, Tjønneland A, Nailler L, Boutron-Ruault M-C, Clavel-Chapelon F, Krogh V, Palli D, Panico S, Tumino R, Ricceri F, Bergmann MM, Boeing H, Li K, Kaaks R, Khaw K-T, Wareham NJ, Crowe FL, Key TJ, Naska A, Trichopoulou A, Trichopoulos D, Leenders M, Peeters PHM, Engeset D, Parr CL, Skeie G, Jakszyn P, Sánchez M-J, Huerta JM, Redondo ML, Barricarte A, Amiano P, Drake I, Sonestedt E, Hallmans G, Johansson I, Fedirko V, Romieux I, Ferrari P, Norat T, Vergnaud AC, Riboli E, Linseisen J (2013) Meat consumption and mortality--results from the European Prospective Investigation into Cancer and Nutrition. *BMC Med* 11 (1):1-12. doi:10.1186/1741-7015-11-63

152. Rugulies R, Jager A, Benesch L, Siegrist J (1996) Comprehensive lifestyle changes among patients with CHD and the integration of inpatient and outpatient cardiac rehabilitation: First results of a secondary prevention intervention trial. [German] (Komprehensive Lebensstiländerung bei Koronarkranken und die Integration stationärer und ambulanter Rehabilitation: Erste Ergebnisse einer sekundärpräventiven Interventionsstudie.). *Zeitschrift für Gesundheitswissenschaften* 4 (3):234-247

153. Sabaté J (1993) Does nut consumption protect against ischaemic heart disease? *Eur J Clin Nutr* 47 Suppl 1:S71-S75

154. Sanchez A, Mejia A, Sanchez J, Runte E, Brown-Fraser S, Bivens RL (2019) Diets with customary levels of fat from plant origin may reverse coronary artery disease. *Med Hypotheses* 122:103-105. doi:10.1016/j.mehy.2018.10.027

155. Satija A, Bhupathiraju SN, Spiegelman D, Chiuve SE, Manson JE, Willett W, Rexrode KM, Rimm EB, Hu FB (2017) Healthful and Unhealthful Plant-Based Diets and the Risk of Coronary Heart Disease in U.S. Adults. *J Am Coll Cardiol* 70 (4):411-422. doi:10.1016/j.jacc.2017.05.047

156. Satija A, Bhupathiraju SN, Spiegelman D, Chiuve SE, Manson JE, Willett WC, Rexrode KM, Rimm EB, Hu FB (2017) Plant-based diets and the risk of coronary heart disease in US adults. *FASEB Journal Conference: Experimental Biology* 31 (1 Supplement 1)

157. Satija A, Hu FB (2018) Plant-based diets and cardiovascular health. *Trends Cardiovasc Med* 28 (7):437-441. doi:10.1016/j.tcm.2018.02.004

158. Satija A, Malik VS, Willett WC, Hu FB (2017) Meta-analysis of red meat intake and cardiovascular risk factors: Methodologic limitations. *Am J Clin Nutr* 105 (6):1567-1568. doi:<http://dx.doi.org/10.3945/ajcn.117.153692>

159. Schulze MB, Martinez-Gonzalez MA, Fung TT, Lichtenstein AH, Forouhi NG (2018) Food based dietary patterns and chronic disease prevention. *BMJ (Online)* 361 (no pagination):k2396. doi:<http://dx.doi.org/10.1136/bmj.k2396>

160. Shan Z, Li Y, Baden MY, Bhupathiraju SN, Wang DD, Sun Q, Rexrode KM, Rimm EB, Qi L, Willett WC, Manson JE, Qi Q, Hu FB (2020) Association between healthy eating patterns and risk of cardiovascular disease. *JAMA Internal Medicine* 180 (8):1090-1100. doi:<http://dx.doi.org/10.1001/jamainternmed.2020.2176>

161. Shan Z, Li Y, Bhupathiraju SN, Wang D, Rexrode KM, Rimm E, Qi L, Willett W, Manson JE, Qi Q, Hu FB (2020) Healthy eating patterns and risk of cardiovascular disease: Results from three large prospective cohort studies. *Circulation Conference: American Heart Association's Epidemiology and Prevention/Lifestyle and Cardiometabolic Health* 141 (SUPPL 1):A37. doi:<http://dx.doi.org/10.1161/circ.141.suppl-1.37>



162. Shiue I, Arima H, Hankey GJ, Anderson CS (2011) Dietary intake of key nutrients and subarachnoid hemorrhage: a population-based case-control study in Australasia. *Cerebrovascular diseases (Basel, Switzerland)* 31 (5):464-470. doi:10.1159/000324386
163. Singh RB, Visen P, Sharma D, Sharma S, Mondol R, Sharma JP, Sharma M, Tokunaga M, Takahashi T, Mishra S, Sharma A, Jain M, Marinho F, Pal R (2014) Study of functional foods consumption patterns among decedents dying due to various causes of death. *Open Nutraceuticals Journal* 8 (1):16-28
164. Spence JD (2013) Intensive risk factor control in stroke prevention. *F1000Prime Reports* 5 (no pagination). doi:<http://dx.doi.org/10.12703/P5-42>
165. Spence JD (2015) Letter by Spence Regarding Article, "diet and Stroke: Recent Evidence Supporting a Mediterranean-Style Diet and Food in the Primary Prevention of Stroke". *Stroke* 46 (9):e221. doi:<http://dx.doi.org/10.1161/STROKEAHA.115.010800>
166. Spence JD (2017) Nutrition in Stroke Prevention. *Semin Neurol* 37 (3):259-266. doi:<http://dx.doi.org/10.1055/s-0037-1603470>
167. Spence JD (2018) Diet for stroke prevention. *Stroke Vasc Neurol* 3 (2):44-50. doi:10.1136/svn-2017-000130
168. Sterling SR, Bowen S-A (2019) The Potential for Plant-Based Diets to Promote Health Among Blacks Living in the United States. *Nutrients* 11 (12):2915. doi:10.3390/nu11122915
169. Ströhle A, Waldmann A, Wolters M, Hahn A (2006) Vegetarian nutrition: preventive potential and possible risks. Part 2: animal foods and recommendations (Vegetarische Ernährung: Präventives Potenzial und mögliche Risiken : Teil 2: Lebensmittel tierischer Herkunft und Empfehlungen). *Wien Klin Wochenschr* 118 (23-24):728-737. doi:10.1007/s00508-006-0716-9
170. Ströhle A, Waldmann A, Wolters M, Hahn A (2006) Vegetarian nutrition: Preventive potential and possible risks. Part 1: Plant foods (Vegetarische Ernährung: Präventives Potenzial und mögliche Risiken. Teil 1: Lebensmittel pflanzlicher Herkunft). *Wien Klin Wochenschr* 118 (19-20):580-593. doi:10.1007/s00508-006-0706-y
171. Sweeney M (2004) Effects of very low-fat diets on anginal symptoms. *Med Hypotheses* 63 (3):553-553. doi:10.1016/j.mehy.2004.05.001
172. Tantrarongroj K, Nelson ER (1990) Incidence of first acute myocardial infarction in the Bangkok Adventist Hospital (1958-1985). *Journal of the Medical Association of Thailand = Chotmaihet thangkaet* 73 (1):29-34
173. Tharrey M, Mariotti F, Mashchak A, Barbillon P, Delattre M, Fraser GE (2018) Patterns of plant and animal protein intake are strongly associated with cardiovascular mortality: the Adventist Health Study-2 cohort. *Int J Epidemiol* 47 (5):1603-1612. doi:10.1093/ije/dyy030
174. Tuso PJ, Ismail MH, Ha BP, Bartolotto C (2013) Nutritional update for physicians: plant-based diets. *Perm J* 17 (2):61-66. doi:10.7812/TPP/12-085
175. Ullmann D, Phillips RL, Beeson WL, Dewey HG, Brin BN, Kuzma JW, Mathews CP, Hirst AE (1991) Cause-specific mortality among physicians with differing life-styles. *JAMA* 265 (18):2352-2359
176. Waaler HT, Hjort PF (1981) Longevity among Norwegian Adventists 1960-1977: a message of life style and health? (Høyere levealder hos norske adventister 1960-1977: et budskap om livsstil og helse?). *Tidsskrift for den Norske lægeforening : tidsskrift for praktisk medicin, ny række* 101 (11):623-627
177. Waaler Th H, Hjort PF (1981) Low mortality among Norwegian Seventh-Day Adventists 1960-1977: A message on lifestyle and health? [Norwegian]. *Tidsskr Nor Laegeforen* 101 (11):623-627+653

178. Wandera SO, Kwagala B, Ntozi J (2015) Prevalence and risk factors for self-reported non-communicable diseases among older Ugandans: a cross-sectional study. *Glob Health Action* 8:27923-27923. doi:10.3402/gha.v8.27923
179. Webster IW, Rawson GK (1979) Health status of Seventh-Day Adventists. *The Medical journal of Australia* 1 (10):417-420
180. Wierzbicki AS, Swaminathan R (2000) Coronary heart disease in Indian Asians. *Lancet* (London, England) 355 (9216):1727-1728. doi:10.1016/S0140-6736(05)73136-6
181. Williams KA (2017) Introduction to the "A plant-based diet and cardiovascular disease" special issue. *Journal of Geriatric Cardiology* 14 (5):316. doi:<http://dx.doi.org/10.11909/j.issn.1671-5411.2017.05.001>
182. Withnell A (2003) The natural cure of coronary heart disease. *Nutr Health* 17 (1):55-60. doi:<http://dx.doi.org/10.1177/026010600301700106>
183. Wong MMH, Louie JCY (2021) A priori dietary patterns and cardiovascular disease incidence in adult population-based studies: a review of recent evidence. *Crit Rev Food Sci Nutr*:1-16. doi:<http://dx.doi.org/10.1080/10408398.2021.1897517>
184. Wynder EL, Lemon FR (1958) Cancer, coronary artery disease and smoking: a preliminary report on differences in incidence between Seventh-day Adventists and others. *Calif Med* 89 (4):267-272
185. Wynder EL, Lemon FR, Bross IJ (1959) Cancer and coronary artery disease among Seventh-Day Adventists. *Cancer* 12:1016-1028. doi:10.1002/1097-0142(195909/10)12:5<1016::aid-cnrc2820120523>3.0.co;2-2
186. Yusuf Z, Alamelu J, Lim M, Dlamini N (2015) Vitamin B12 deficiency-a poorly recognised and treatable childhood stroke risk factor. *Stroke Conference: American Heart Association/American Stroke Association* 46 (SUPPL. 1)
187. Zhou YF, Song XY, Wu J, Chen GC, Neelakantan N, van Dam RM, Feng L, Yuan JM, Pan A, Koh WP (2021) Association Between Dietary Patterns in Midlife and Healthy Ageing in Chinese Adults: The Singapore Chinese Health Study. *J Am Med Dir Assoc* 22 (6):1279-1286. doi:<http://dx.doi.org/10.1016/j.jamda.2020.09.045>
188. Ferraro RA, Fischer NM, Xun H, Michos ED (2020) Nutrition and physical activity recommendations from the United States and European cardiovascular guidelines: a comparative review. *Curr Opin Cardiol* 35 (5):508-516. doi:10.1097/hco.0000000000000763
189. Fraser GE (1999) Diet as primordial prevention in Seventh-Day Adventists. *Prev Med* 29 (6 II):S18-S23. doi:<http://dx.doi.org/10.1006/pmed.1998.0415>
190. Fraser GE (1999) Associations between diet and cancer, ischemic heart disease, and all-cause mortality in non-Hispanic white California Seventh-day Adventists. *The American journal of clinical nutrition* 70 (3 Suppl):532S-538S. doi:10.1093/ajcn/70.3.532s
191. Jenkins DJA, Kendall CWC, Marchie A, Jenkins AL, Connelly PW, Jones PJH, Vuksan V (2003) The Garden of Eden - Plant based diets, the genetic drive to conserve cholesterol and its implications for heart disease in the 21st century. *Comparative Biochemistry and Physiology - A Molecular and Integrative Physiology* 136 (1):141-151. doi:<http://dx.doi.org/10.1016/S1095-6433%2802%2900345-8>
192. Lecerf J-M (2011) Meat and human health: excess and errors (Viande et santé humaine: excès et défauts). *Bull Acad Natl Med* 195 (8):1801-1812
193. Navarro JCA, Prado SMC, Cárdenas PA, Santos RD, Caramelli B (2010) Pre-historic eating patterns in Latin America and protective effects of plant-based diets on cardiovascular risk factors. *Clinics (Sao Paulo)* 65 (10):1049-1054. doi:10.1590/s1807-59322010001000022
194. Neuhouser ML (2019) The importance of healthy dietary patterns in chronic disease prevention. *Nutr Res* 70:3-6. doi:<http://dx.doi.org/10.1016/j.nutres.2018.06.002>



195. Patel H, Chandra S, Alexander S, Soble J, Williams KA, Sr. (2017) Plant-Based Nutrition: An Essential Component of Cardiovascular Disease Prevention and Management. *Curr Cardiol Rep* 19 (10):104-104. doi:10.1007/s11886-017-0909-z
196. Samuel A, Hyman S (2004) Plants: Diet and health. *Nutr Bull* 29 (2):156-159
197. Meta-analysis sows doubt. Vegetarians live healthier lives but is it the food? (2014) (Metaanalyse sät Zweifel. Vegetarier leben gesünder aber liegt es am Essen?). *MMW Fortschritte der Medizin* 156 Spec no 2:7-7
198. Alrabadi NI (2012) The effect of lifestyle food on chronic diseases: a comparison between vegetarians and non-vegetarians in Jordan. *Global journal of health science* 5 (1):65-69. doi:10.5539/gjhs.v5n1p65
199. Anderson CAM (2018) Dietary Patterns to Reduce Weight and Optimize Cardiovascular Health: Persuasive Evidence for Promoting Multiple, Healthful Approaches. *Circulation* 137 (11):1114-1116. doi:10.1161/CIRCULATIONAHA.117.031429
200. Barnard ND, Scherwitz LW, Ornish D (1992) Adherence and acceptability of a low-fat, vegetarian diet among patients with cardiac disease. *J Cardiopulm Rehabil* 12 (6):423-431. doi:<http://dx.doi.org/10.1097/00008483-199211000-00009>
201. Caspermeyer J (2016) Are We What We Eat? Evidence of a Vegetarian Diet Permanently Shaping the Human Genome to Change Individual Risk of Cancer and Heart Disease. *Mol Biol Evol* 33 (7):1887-1888. doi:10.1093/molbev/msw076
202. Fraser GE, Orlich MJ, Jaceldo-Siegl K (2015) Studies of chronic disease in Seventh-day Adventists. *Int J Cardiol* 184:573-573. doi:10.1016/j.ijcard.2015.03.015
203. Fresan U, Craig WJ, Martinez-Gonzalez MA, Bes-Rastrollo M (2020) Nutritional quality and health effects of low environmental impact diets: The "seguimiento universidad de navarra" (sun) Cohort. *Nutrients* 12 (8):1-19. doi:<http://dx.doi.org/10.3390/nu12082385>
204. Fugar S, Fughhi IA, McDaniel R, Gates S, Sawyer S, Mason T, Williams KA (2019) Impact of a plant-based nutrition intervention on the 10-year ascvd risk in African Americans. *Circulation Conference: American Heart Association Scientific Sessions, AHA* 140 (Suppl 1):A16318. doi:[http://dx.doi.org/10.1161/circ.140.suppl\\_1.16318](http://dx.doi.org/10.1161/circ.140.suppl_1.16318)
205. Harvey T, Smillie L, Ikin A, Farshid A (2020) 753 The Effect of a Plant-Based Diet on Cardiovascular Risk Factors in Patients With Ischaemic Heart Disease. *Heart Lung and Circulation* 29 (Supplement 2):S375. doi:<http://dx.doi.org/10.1016/j.hlc.2020.09.760>
206. Jakše B, Jakše B, Godnov U, Pinter S (2021) Nutritional, Cardiovascular Health and Lifestyle Status of 'Health Conscious' Adult Vegans and Non-Vegans from Slovenia: A Cross-Sectional Self-Reported Survey. *Int J Environ Res Public Health* 18 (11):5968. doi:10.3390/ijerph18115968
207. Kim HS, Rotundo L, Deutsch J, Kothari N, Ahlawat S, Demyen M, Pyrsopoulos N (2016) Obesity and cardiovascular disease risk in vegetarians in the United States: A population-based study. *Am J Gastroenterol* 111 (Supplement 1):S433. doi:<http://dx.doi.org/10.1038/ajg.2016.360>
208. Liao C-M, Lin C-M (2018) Life Course Effects of Socioeconomic and Lifestyle Factors on Metabolic Syndrome and 10-Year Risk of Cardiovascular Disease: A Longitudinal Study in Taiwan Adults. *Int J Environ Res Public Health* 15 (10):2178. doi:10.3390/ijerph15102178
209. Lopes T, Zemlin AE, Erasmus RT, Faber M, Kengne AP (2020) Assessment of the association of plant-based diets with cardiovascular disease risk profile in Africa: a systematic review and meta-analysis protocol. *BMJ Open* 10 (6): e036792. doi:10.1136/bmjopen-2020-036792
210. Rees K, Al-Khudairy L, Takeda A, Stranges S (2021) Vegan dietary pattern for the primary and secondary prevention of cardiovascular diseases. *Cochrane Database Syst Rev* 2 (2):Cd013501. doi:10.1002/14651858.CD013501.pub2

211. Rosa EMD, Scatola RP, Possa R (2008) Cardiovascular risk in vegetarians and omnivores: a comparative study. *Arq Bras Cardiol* 91 (4):263-288. doi:10.1590/s0066-782x2008001600013
212. Roy S, Gupta A, Chawla K, Tsigoulis M, Verma S, Gupta MK (2011) Prevalence of risk factors and occult coronary disease in South Asians referred to a specialized risk assessment clinic. *Can J Cardiol* 27 (5):S68-S69. doi:<http://dx.doi.org/10.1016/j.cjca.2011.07.033>
213. Sebastiani G, Herranz Barbero A, Borrás-Novell C, Alsina Casanova M, Aldecoa-Bilbao V, Andreu-Fernández V, Pascual Tutusaus M, Ferrero Martínez S, Gómez Roig MD, García-Algar O (2019) The Effects of Vegetarian and Vegan Diet during Pregnancy on the Health of Mothers and Offspring. *Nutrients* 11 (3):557. doi:10.3390/nu11030557
214. Singh PN, Sabate J, Fraser GE (2003) Does low meat consumption increase life expectancy in humans? *Am J Clin Nutr* 78 (3 SUPPL.):526S-532S
215. Skorek P, Glibowski P, Banach K (2019) Nutrition of vegetarians in Poland – a review of research. *Rocz Panstw Zakl Hig* 70 (3):217-223. doi:10.32394/rpzh.2019.0072
216. Van Winckel M, Vande Velde S, De Bruyne R, Van Biervliet S (2011) Clinical practice: vegetarian infant and child nutrition. *Eur J Pediatr* 170 (12):1489-1494. doi:10.1007/s00431-011-1547-x
217. Cullum-Dugan D, Pawlak R (2015) Position of the academy of nutrition and dietetics: vegetarian diets. *J Acad Nutr Diet* 115 (5):801-810. doi:10.1016/j.jand.2015.02.033
218. Adams M, Sabaté J (2019) Sexual Dimorphism in Cardiovascular Disease Risk and Risk Factors Among Vegetarians: an Exploration of the Potential Mechanisms. *Current atherosclerosis reports* 21 (9):35-35. doi:10.1007/s11883-019-0796-4
219. American Dietetic A, Dietitians of C (2003) Position of the American Dietetic Association and Dietitians of Canada: Vegetarian diets. *J Am Diet Assoc* 103 (6):748-765. doi:10.1053/jada.2003.50142
220. American Dietetic A, Dietitians of C (2003) Position of the American Dietetic Association and Dietitians of Canada: vegetarian diets. *Canadian journal of dietetic practice and research : a publication of Dietitians of Canada = Revue canadienne de la pratique et de la recherche en dietetique : une publication des Dietetistes du Canada* 64 (2):62-81. doi:10.3148/64.2.2003.62
221. Appleby PN, Thorogood M, Mann JI, Key TJ (1999) The Oxford Vegetarian Study: an overview. *The American journal of clinical nutrition* 70 (3 Suppl):525S-531S. doi:10.1093/ajcn/70.3.525s
222. Attaye I, Pinto-Sietsma S-J, Herrema H, Nieuwdorp M (2020) A Crucial Role for Diet in the Relationship Between Gut Microbiota and Cardiometabolic Disease. *Annu Rev Med* 71:149-161. doi:10.1146/annurev-med-062218-023720
223. Barnard ND, Goldman DM, Loomis JF, Kahleova H, Levin SM, Neabore S, Batts TC (2019) Plant-Based Diets for Cardiovascular Safety and Performance in Endurance Sports. *Nutrients* 11 (1):130. doi:10.3390/nu11010130
224. Battaglia Richi E, Baumer B, Conrad B, Darioli R, Schmid A, Keller U (2015) Health Risks Associated with Meat Consumption: A Review of Epidemiological Studies. *International journal for vitamin and nutrition research Internationale Zeitschrift fur Vitamin- und Ernährungsforschung Journal international de vitaminologie et de nutrition* 85 (1-2):70-78. doi:10.1024/0300-9831/a000224
225. Burr M (1990) Vegetarianism and health. *The Practitioner* 234 (1481):62-64
226. Burr ML (1990) Vegetarianism, fish eating and jogging. *J R Soc Health* 110 (4):144-145. doi:10.1177/146642409011000413
227. Burr ML (1992) Particular diets and cardiovascular risk. *Bibl Nutr Dieta* 49:102-110. doi:10.1159/000421439

228. Campbell T (2017) A plant-based diet and stroke. *J Geriatr Cardiol* 14 (5):321-326. doi:10.11909/j.issn.1671-5411.2017.05.010
229. Caprara G (2018) Diet and longevity: The effects of traditional eating habits on human lifespan extension. *Med J Nutrition Metab* 11 (3):261-264. doi:<http://dx.doi.org/10.3233/MNM-180225>
230. Craig WJ (2009) Health effects of vegan diets. *The American journal of clinical nutrition* 89 (5):1627S-1633S. doi:10.3945/ajcn.2009.26736N
231. Craig WJ (2010) Nutrition concerns and health effects of vegetarian diets. *Nutrition in clinical practice : official publication of the American Society for Parenteral and Enteral Nutrition* 25 (6):613-620. doi:10.1177/0884533610385707
232. Craig WJ, Mangels AR, American Dietetic A (2009) Position of the American Dietetic Association: vegetarian diets. *J Am Diet Assoc* 109 (7):1266-1282. doi:10.1016/j.jada.2009.05.027
233. Dagnelie PC (2003) Nutrition and health--potential health benefits and risks of vegetarianism and limited consumption of meat in the Netherlands (Voeding en gezondheid--potentiële gezondheidsvoordelen en risico's van vegetarisme en beperkte vleesconsumptie in Nederland). *Ned Tijdschr Geneesk* 147 (27):1308-1313
234. Deedwania P, Singh V (2005) Coronary artery disease in south Asians: Evolving strategies for treatment and prevention. *Indian Heart J* 57 (6):617-631
235. Desmond MA, Sobiecki J, Fewtrell M, Wells JCK (2018) Plant-based diets for children as a means of improving adult cardiometabolic health. *Nutr Rev* 76 (4):260-273. doi:10.1093/nutrit/nux079
236. Dinu M, Pagliai G, Sofi F (2017) A Heart-Healthy Diet: Recent Insights and Practical Recommendations. *Curr Cardiol Rep* 19 (10):95. doi:10.1007/s11886-017-0908-0
237. do Rosario VA, Fernandes R, Trindade EBSdM (2016) Vegetarian diets and gut microbiota: important shifts in markers of metabolism and cardiovascular disease. *Nutr Rev* 74 (7):444-454. doi:10.1093/nutrit/nuw012
238. Dominique Ashen M (2013) Vegetarian diets in cardiovascular prevention. *Curr Treat Options Cardiovasc Med* 15 (6):735-745. doi:10.1007/s11936-013-0266-1
239. Dwyer JT (1988) Health aspects of vegetarian diets. *The American journal of clinical nutrition* 48 (3 Suppl):712-738. doi:10.1093/ajcn/48.3.712
240. Enas EA, Mehta J (1995) Malignant coronary artery disease in young Asian Indians: thoughts on pathogenesis, prevention, and therapy. *Coronary Artery Disease in Asian Indians (CADI) Study. Clin Cardiol* 18 (3):131-135. doi:10.1002/clc.4960180305
241. Esselstyn CB (2017) A plant-based diet and coronary artery disease: a mandate for effective therapy. *J Geriatr Cardiol* 14 (5):317-320. doi:10.11909/j.issn.1671-5411.2017.05.004
242. Fischer NM, Pallazola VA, Xun H, Cainzos-Achirica M, Michos ED (2020) The evolution of the heart-healthy diet for vascular health: A walk through time. *Vasc Med* 25 (2):184-193. doi:10.1177/1358863x19901287
243. Fraser GE (1988) Determinants of ischemic heart disease in Seventh-day Adventists: a review. *The American journal of clinical nutrition* 48 (3 Suppl):833-836. doi:10.1093/ajcn/48.3.833
244. Fraser GE (1994) Diet and coronary heart disease: beyond dietary fats and low-density-lipoprotein cholesterol. *The American journal of clinical nutrition* 59 (5 Suppl):1117S-1123S. doi:10.1093/ajcn/59.5.1117S
245. Fraser GE (1999) Diet as primordial prevention in Seventh-Day Adventists. *Prev Med* 29 (6 Pt 2):S18-S23. doi:10.1006/pmed.1998.0415

246. Fraser GE (2009) Vegetarian diets: what do we know of their effects on common chronic diseases? *The American journal of clinical nutrition* 89 (5):1607S-1612S. doi:10.3945/ajcn.2009.26736K
247. Freeman AM, Morris PB, Barnard N, Esselstyn CB, Ros E, Agatston A, Devries S, O'Keefe J, Miller M, Ornish D, Williams K, Kris-Etherton P (2017) Trending Cardiovascular Nutrition Controversies. *J Am Coll Cardiol* 69 (9):1172-1187. doi:<http://dx.doi.org/10.1016/j.jacc.2016.10.086>
248. Gardner CD (2001) The role of plant-based diets in the treatment and prevention of coronary artery disease. *Coron Artery Dis* 12 (7):553-559. doi:10.1097/00019501-200111000-00005
249. Ginter E (2008) Vegetarian diets, chronic diseases and longevity. *Bratisl Lek Listy* 109 (10):463-466
250. Glueck CJ, Connor WE (1978) Diet-coronary heart disease relationships reconnoitered. *The American journal of clinical nutrition* 31 (5):727-737. doi:10.1093/ajcn/31.5.727
251. Gomez-Delgado F, Katsiki N, Lopez-Miranda J, Perez-Martinez P (2021) Dietary habits, lipoprotein metabolism and cardiovascular disease: From individual foods to dietary patterns. *Crit Rev Food Sci Nutr* 61 (10):1651-1669. doi:10.1080/10408398.2020.1764487
252. Hankey GJ (2012) Nutrition and the risk of stroke. *The Lancet Neurology* 11 (1):66-81. doi:<http://dx.doi.org/10.1016/S1474-4422%2811%2970265-4>
253. Hardinge MG, Crooks H (1963) Non-Flesh Diets. *J Am Diet Assoc* 43 (6):550-558
254. Havala S, Dwyer J (1993) Position of the American Dietetic Association: vegetarian diets. *J Am Diet Assoc* 93 (11):1317-1319. doi:10.1016/0002-8223(93)91966-t
255. Hemler EC, Hu FB (2019) Plant-Based Diets for Personal, Population, and Planetary Health. *Advances in nutrition (Bethesda, Md)* 10 (4 Supplement):S275-S283. doi:<http://dx.doi.org/10.1093/advances/nmy117>
256. Hemler EC, Hu FB (2019) Plant-Based Diets for Cardiovascular Disease Prevention: All Plant Foods Are Not Created Equal. *Current atherosclerosis reports* 21 ( 18). doi:10.1007/s11883-019-0779-5
257. Hemler EC, Hu FB (2019) Plant-Based Diets for Personal, Population, and Planetary Health. *Adv Nutr* 10 (Suppl\_4):S275-s283. doi:10.1093/advances/nmy117
258. Hever J, Cronise RJ (2017) Plant-based nutrition for healthcare professionals: implementing diet as a primary modality in the prevention and treatment of chronic disease. *J Geriatr Cardiol* 14 (5):355-368. doi:10.11909/j.issn.1671-5411.2017.05.012
259. Houston M (2018) The role of noninvasive cardiovascular testing, applied clinical nutrition and nutritional supplements in the prevention and treatment of coronary heart disease. *Ther Adv Cardiovasc Dis* 12 (3):85-108. doi:<http://dx.doi.org/10.1177/1753944717743920>
260. Houston M, Minich D, Sinatra ST, Kahn JK, Guarneri M (2018) Recent Science and Clinical Application of Nutrition to Coronary Heart Disease. *J Am Coll Nutr* 37 (3):169-187. doi:<http://dx.doi.org/10.1080/07315724.2017.1381053>
261. Joulie C (2021) Risks and benefits of vegetarianism and veganism (Risques et benefices du vegetarisme et du vegetalisme.). *Actual Pharm* 60 (602):23-27. doi:<http://dx.doi.org/10.1016/j.actpha.2020.11.006>
262. Kahleova H, Levin S, Barnard N (2017) Cardio-Metabolic Benefits of Plant-Based Diets. *Nutrients* 9 (8): 848. doi:10.3390/nu9080848
263. Kahleova H, Levin S, Barnard ND (2018) Vegetarian Dietary Patterns and Cardiovascular Disease. *Prog Cardiovasc Dis* 61 (1):54-61. doi:10.1016/j.pcad.2018.05.002



264. Kahleova H, Salas-Salvadó J, Rahelić D, Kendall CW, Rembert E, Sievenpiper JL (2019) Dietary Patterns and Cardiometabolic Outcomes in Diabetes: A Summary of Systematic Reviews and Meta-Analyses. *Nutrients* 11 (9):2209. doi:10.3390/nu11092209
265. Kaiser J, van Daalen KR, Thayyil A, Cocco M, Caputo D, Oliver-Williams C (2021) A Systematic Review of the Association Between Vegan Diets and Risk of Cardiovascular Disease. *J Nutr* 151 (6):1539-1552. doi:10.1093/jn/nxab037
266. Kendler BS (1997) Recent nutritional approaches to the prevention and therapy of cardiovascular disease. *Prog Cardiovasc Nurs* 12 (3):3-23
267. Key TJ, Appleby PN, Rosell MS (2006) Health effects of vegetarian and vegan diets. *Proc Nutr Soc* 65 (1):35-41. doi:<http://dx.doi.org/10.1079/PNS2005481>
268. Key TJ, Davey GK, Appleby PN (1999) Health benefits of a vegetarian diet. *The Proceedings of the Nutrition Society* 58 (2):271-275. doi:10.1017/s0029665199000373
269. Kim H, Rebholz CM (2021) Metabolomic Biomarkers of Healthy Dietary Patterns and Cardiovascular Outcomes. *Curr Atheroscler Rep* 23 (6):26. doi:10.1007/s11883-021-00921-8
270. Kimokoti RW, Millen BE (2016) Nutrition for the Prevention of Chronic Diseases. *Med Clin North Am* 100 (6):1185-1198. doi:<http://dx.doi.org/10.1016/j.mcna.2016.06.003>
271. Krajcovicova-Kudlackova M (2005) Health benefits of plant food. *Klinicka Biochemie a Metabolismus* 13 (4):168-171
272. Krajcovicová-Kudláčková M, Simoncic R, Béderová A (1997) Risks and advantages of the vegetarian diet (Riziká a prednosti vegetariánskej výživy). *Cas Lek Cesk* 136 (23):715-719
273. Krishnamoorthy KM (1999) Diet and coronary artery disease. *Indian Heart J* 51 (3):268-274
274. Lanou AJ, Svenson B (2010) Vegetarian Dietary Patterns as a Means to Achieve Reduction in Cardiovascular Disease and Diabetes Risk Factors. *Curr Cardiovasc Risk Rep* 4 (1):48-56. doi:<http://dx.doi.org/10.1007/s12170-009-0075-y>
275. Le LT, Sabaté J (2014) Beyond meatless, the health effects of vegan diets: findings from the Adventist cohorts. *Nutrients* 6 (6):2131-2147. doi:10.3390/nu6062131
276. Leitzmann C (2005) Vegetarian diets: what are the advantages? *Forum Nutr* 57:147-156. doi:10.1159/000083787
277. Li D (2014) Effect of the vegetarian diet on non-communicable diseases. *J Sci Food Agric* 94 (2):169-173. doi:10.1002/jsfa.6362
278. Liday C, Kirkpatrick C (2019) Optimal Dietary Strategies for Prevention of Atherosclerotic Cardiovascular Disease in Diabetes: Evidence and Recommendations. *Curr Cardiol Rep* 21 (11). doi:<http://dx.doi.org/10.1007/s11886-019-1232-7>
279. Lin CL (1997) Vegetarianism. *Tzu Chi Medical Journal* 9 (2):81-89
280. Lin CL (2021) Stroke and diets-A review. *Tzu Chi Medical Journal* 33 (3):238-242. doi:[http://dx.doi.org/10.4103/tcmj.tcmj\\_168\\_20](http://dx.doi.org/10.4103/tcmj.tcmj_168_20)
281. McCarty MF (1999) Vegan proteins may reduce risk of cancer, obesity, and cardiovascular disease by promoting increased glucagon activity. *Med Hypotheses* 53 (6):459-485. doi:10.1054/mehy.1999.0784
282. McCarty MF (2003) IGF-I activity may be a key determinant of stroke risk--a cautionary lesson for vegans. *Med Hypotheses* 61 (3):323-334. doi:10.1016/s0306-9877(02)00241-4
283. McCarty MF (2004) A shift in myocardial substrate, improved endothelial function, and diminished sympathetic activity may contribute to the anti-anginal impact of very-low-fat diets. *Med Hypotheses* 62 (1):62-71. doi:10.1016/s0306-9877(03)00232-9
284. McEvoy CT, Temple N, Woodside JV (2012) Vegetarian diets, low-meat diets and health: a review. *Public Health Nutr* 15 (12):2287-2294. doi:10.1017/S1368980012000936

285. Medina-Remón A, Kirwan R, Lamuela-Raventós RM, Estruch R (2018) Dietary patterns and the risk of obesity, type 2 diabetes mellitus, cardiovascular diseases, asthma, and neurodegenerative diseases. *Crit Rev Food Sci Nutr* 58 (2):262-296. doi:10.1080/10408398.2016.1158690
286. Melina V, Craig W, Levin S (2016) Position of the Academy of Nutrition and Dietetics: Vegetarian Diets. *J Acad Nutr Diet* 116 (12):1970-1980. doi:10.1016/j.jand.2016.09.025
287. Migliaccio S, Brasacchio C, Pivari F, Salzano C, Barrea L, Muscogiuri G, Savastano S, Colao A (2020) What is the best diet for cardiovascular wellness? A comparison of different nutritional models. *Int J Obes Suppl* 10 (1):50-61. doi:10.1038/s41367-020-0018-0
288. Norman K, Klaus S (2020) Veganism, aging and longevity: new insight into old concepts. *Curr Opin Clin Nutr Metab Care* 23 (2):145-150. doi:10.1097/MCO.0000000000000625
289. O'Keefe JH, Torres-Acosta N, O'Keefe EL, Saeed IM, Lavie CJ, Smith SE, Ros E (2020) A Pesco-Mediterranean Diet With Intermittent Fasting: JACC Review Topic of the Week. *J Am Coll Cardiol* 76 (12):1484-1493. doi:10.1016/j.jacc.2020.07.049
290. Pallazola VA, Davis DM, Whelton SP, Cardoso R, Latina JM, Michos ED, Sarkar S, Blumenthal RS, Arnett DK, Stone NJ, Welty FK (2019) A Clinician's Guide to Healthy Eating for Cardiovascular Disease Prevention. *Mayo Clin Proc Innov Qual Outcomes* 3 (3):251-267. doi:10.1016/j.mayocpiqo.2019.05.001
291. Panagiotakos DB, Notara V, Kouvari M, Pitsavos C (2016) The Mediterranean and other Dietary Patterns in Secondary Cardiovascular Disease Prevention: A Review. *Curr Vasc Pharmacol* 14 (5):442-451. doi:10.2174/1570161114999160719104731
292. Penkov A (2005) Vegetarian diet in human health. *Acta Medica Bulgarica* 32 (1):22-34
293. Phillips F (2005) Vegetarian nutrition. *Nutr Bull* 30 (2):132-167. doi:<http://dx.doi.org/10.1111/j.1467-3010.2005.00467.x>
294. Pilis W, Stec K, Zych M, Pilis A (2014) Health benefits and risk associated with adopting a vegetarian diet. *Rocz Panstw Zakl Hig* 65 (1):9-14
295. Pratt C (2010) Alternative prevention and treatment of cardiovascular disease Part 1. Primary Care - Clinics in Office Practice 37 (2):325-337. doi:<http://dx.doi.org/10.1016/j.pop.2010.02.009>
296. Rajaram S, Sabaté J (2000) Health benefits of a vegetarian diet. *Nutrition (Burbank, Los Angeles County, Calif)* 16 (7-8):531-533. doi:10.1016/s0899-9007(00)00305-1
297. Ravera A, Carubelli V, Sciatti E, Bonadei I, Gorga E, Cani D, Vizzarda E, Metra M, Lombardi C (2016) Nutrition and cardiovascular disease: Finding the perfect recipe for cardiovascular health. *Nutrients* 8 (6):363. doi:<http://dx.doi.org/10.3390/nu8060363>
298. Richi EB, Baumer B, Conrad B, Darioli R, Schmid A, Keller U (2015) Health risks associated with meat consumption: A review of epidemiological studies. *Int J Vitam Nutr Res* 85 (1-2):70-78. doi:<http://dx.doi.org/10.1024/0300-9831/a000224>
299. Rocha JP, Laster J, Parag B, Shah NU (2019) Multiple Health Benefits and Minimal Risks Associated with Vegetarian Diets. *Current nutrition reports* 8 (4):374-381. doi:10.1007/s13668-019-00298-w
300. Sabaté J (1999) Nut consumption, vegetarian diets, ischemic heart disease risk, and all-cause mortality: evidence from epidemiologic studies. *The American journal of clinical nutrition* 70 (3 Suppl):500S-503S. doi:10.1093/ajcn/70.3.500s
301. Sabate J (2003) The contribution of vegetarian diets to health and disease: A paradigm shift? *Am J Clin Nutr* 78 (3 SUPPL.):502S-507S
302. Sabaté J (2003) The contribution of vegetarian diets to human health. *Forum Nutr* 56:218-220



303. Segasothy M, Phillips PA (1999) Vegetarian diet: panacea for modern lifestyle diseases? *QJM : monthly journal of the Association of Physicians* 92 (9):531-544. doi:10.1093/qjmed/92.9.531
304. Segovia-Siapco G, Sabaté J (2018) Health and sustainability outcomes of vegetarian dietary patterns: a revisit of the EPIC-Oxford and the Adventist Health Study-2 cohorts. *Eur J Clin Nutr* 72 (Suppl 1):60-70. doi:10.1038/s41430-018-0310-z
305. Singh PN, Arthur KN, Orlich MJ, James W, Purty A, Job JS, Rajaram S, Sabaté J (2014) Global epidemiology of obesity, vegetarian dietary patterns, and noncommunicable disease in Asian Indians. *The American journal of clinical nutrition* 100 Suppl 1 (1):359S-364S. doi:10.3945/ajcn.113.071571
306. Spence JD, Azarpazhooh MR, Larsson SC, Bogiatzi C, Hankey GJ (2020) Stroke Prevention in Older Adults: Recent Advances. *Stroke* 51 (12):3770-3777. doi:10.1161/strokeaha.120.031707
307. Sticher MA, Smith CB, Davidson S (2010) Reducing heart disease through the vegetarian diet using primary prevention. *J Am Acad Nurse Pract* 22 (3):134-139. doi:10.1111/j.1745-7599.2009.00483.x
308. Strohle A, Hahn A (2016) Health outcomes of vegetarian nutrition - An update. [German] (Vor- und Nachteile vegetarischer Ernährungsformen - Aktueller wissenschaftlicher Kenntnisstand.). *Ther Umsch* 73 (11):659-672. doi:<http://dx.doi.org/10.1024/0040-5930/a000848>
309. Strohle A, Loser C, Behrendt I, Leitzmann C, Hahn A (2016) Alternative Diets: Part 1: Overview and Vegetarian Diets. [German] (Alternative Ernährungsformen: Teil 1: Allgemeine Aspekte und vegetarische Kostformen.). *Aktuelle Ernährungsmedizin* 41 (1):47-65. doi:<http://dx.doi.org/10.1055/s-0041-111459>
310. Ströhle A, Löser C, Behrendt I, Leitzmann C, Hahn A (2018) Alternative Ernährungsformen: Allgemeine Aspekte und vegetarische Kostformen. (Alternative diets: general aspects and vegetarian diets) [German]. *Die Rehabilitation* 57 (1):55-70. doi:10.1055/s-0043-124048
311. Thorogood M (1994) Vegetarianism, coronary disease risk factors and coronary heart disease. *Curr Opin Lipidol* 5 (1):17-21. doi:10.1097/00041433-199402000-00004
312. Tindall AM, Petersen KS, Kris-Etherton PM (2018) Dietary Patterns Affect the Gut Microbiome-The Link to Risk of Cardiometabolic Diseases. *The Journal of nutrition* 148 (9):1402-1407. doi:10.1093/jn/nxy141
313. Trautwein EA, McKay S (2020) The Role of Specific Components of a Plant-Based Diet in Management of Dyslipidemia and the Impact on Cardiovascular Risk. *Nutrients* 12 (9):2671. doi:10.3390/nu12092671
314. Willcox DC, Scapagnini G, Willcox BJ (2014) Healthy aging diets other than the Mediterranean: A focus on the Okinawan diet. *Mech Ageing Dev* 136:148-162. doi:<http://dx.doi.org/10.1016/j.mad.2014.01.002>
315. Wong JMW (2014) Gut microbiota and cardiometabolic outcomes: influence of dietary patterns and their associated components. *The American journal of clinical nutrition* 100 Suppl 1:369S-377S. doi:10.3945/ajcn.113.071639
316. Wong M-W, Yi C-H, Liu T-T, Lei W-Y, Hung J-S, Lin C-L, Lin S-Z, Chen C-L (2018) Impact of vegan diets on gut microbiota: An update on the clinical implications. *Ci Ji Yi Xue Za Zhi* 30 (4):200-203. doi:10.4103/tcmj.tcmj\_21\_18
317. Woo KS, Kwok TCY, Celermajor DS (2014) Vegan diet, subnormal vitamin B-12 status and cardiovascular health. *Nutrients* 6 (8):3259-3273. doi:10.3390/nu6083259
318. Zampelas A, Magriplis E (2020) Dietary patterns and risk of cardiovascular diseases: a review of the evidence. *The Proceedings of the Nutrition Society* 79 (1):68-75. doi:10.1017/S0029665119000946

319. Zarraga IGE, Schwarz ER (2006) Impact of dietary patterns and interventions on cardiovascular health. *Circulation* 114 (9):961-973.  
doi:<http://dx.doi.org/10.1161/CIRCULATIONAHA.105.603910>
320. Archundia Herrera MC, Subhan FB, Chan CB (2017) Dietary Patterns and Cardiovascular Disease Risk in People with Type 2 Diabetes. *Current obesity reports* 6 (4):405-413. doi:10.1007/s13679-017-0284-5
321. Arntzenius AC (1986) Diet, lipoproteins and the progression of coronary atherosclerosis. *The Leiden Intervention Trial. Drugs* 31 Suppl 1:61-65.  
doi:10.2165/00003495-198600311-00011
322. Arntzenius AC, Kromhout D, Barth JD, Reiber JH, Brusckhe AV, Buis B, van Gent CM, Kempen-Voogd N, Strikwerda S, van der Velde EA (1985) Diet, lipoproteins, and the progression of coronary atherosclerosis. *The Leiden Intervention Trial. The New England journal of medicine* 312 (13):805-811. doi:10.1056/NEJM198503283121301
323. de Lorgeril M, Salen P, Monjaud I, Delaye J (1997) The 'diet heart' hypothesis in secondary prevention of coronary heart disease. *Eur Heart J* 18 (1):13-18.  
doi:10.1093/oxfordjournals.eurheartj.a015094
324. Djekic D, Carlsson F, Landberg R, Sarnqvist C, Cao Y, Tremaroli V, Backhed F, Frøbert O (2019) VEgetaRian Diet in patients with Ischemic heart disease (VERDI): An open-label, randomized, prospective, cross-over study. *Eur Heart J* 40 (Supplement 1):3819.  
doi:<http://dx.doi.org/10.1093/eurheartj/ehz746.0813>
325. Djekic D, Shi L, Brolin H, Carlsson F, Särnqvist C, Savolainen O, Cao Y, Bäckhed F, Tremaroli V, Landberg R, Frøbert O (2020) Effects of a Vegetarian Diet on Cardiometabolic Risk Factors, Gut Microbiota, and Plasma Metabolome in Subjects With Ischemic Heart Disease: A Randomized, Crossover Study. *J Am Heart Assoc* 9 (18):e016518.  
doi:10.1161/jaha.120.016518
326. Djekic D, Shi L, Calais F, Carlsson F, Landberg R, Hyötyläinen T, Frøbert O (2020) Effects of a Lacto-Ovo-Vegetarian Diet on the Plasma Lipidome and Its Association with Atherosclerotic Burden in Patients with Coronary Artery Disease-A Randomized, Open-Label, Cross-over Study. *Nutrients* 12 (11): 3586. doi:10.3390/nu12113586
327. Dogra S, Getz A, Woolf K, Newman JD, Xia Y, Slater J, Shah B (2020) Long-term Dietary and Weight Changes Following a Short-term Dietary Intervention Study: 4-year Follow-up of the Evade Cad Trial. *Circulation Conference: American Heart Association Scientific Sessions, AHA* 142 (Suppl 3):A15565.  
doi:[http://dx.doi.org/10.1161/circ.142.suppl\\_3.15565](http://dx.doi.org/10.1161/circ.142.suppl_3.15565)
328. Esselstyn CB, Jr. (1999) Updating a 12-year experience with arrest and reversal therapy for coronary heart disease (an overdue requiem for palliative cardiology). *The American journal of cardiology* 84 (3):339-A338. doi:10.1016/s0002-9149(99)00290-8
329. Esselstyn CB, Jr., Gendy G, Doyle J, Golubic M, Roizen MF (2014) A way to reverse CAD? *The Journal of family practice* 63 (7):356-364b
330. Gould KL, Ornish D, Scherwitz L, Brown S, Edens RP, Hess MJ, Mullani N, Bolomey L, Dobbs F, Armstrong WT, et al. (1995) Changes in myocardial perfusion abnormalities by positron emission tomography after long-term, intense risk factor modification. *JAMA* 274 (11):894-901. doi:10.1001/jama.1995.03530110056036
331. Gupta P, Arora S, Bansal A, Qamar A, Kurien S, Palleda G, Batra V, Mahajan S, Hendrickson M, Jain G, Safal S, Khosla AA, Vaduganathan M, Bhatt D, Gupta M (2021) Risk Factors and Outcomes of Young Adults Who Experience Myocardial Infarction: Insights from the Norin-Stemi Registry. *J Am Coll Cardiol* 77 (18 Supplement 1):110.  
doi:<http://dx.doi.org/10.1016/S0735-1097%2821%2901469-8>
332. Gupta SK, Sawhney RC, Rai L, Chavan VD, Dani S, Arora RC, Selvamurthy W, Chopra HK, Nanda NC (2011) Regression of coronary atherosclerosis through healthy

- lifestyle in coronary artery disease patients--Mount Abu Open Heart Trial. *Indian Heart J* 63 (5):461-469
333. Ivanov AN, Medkova IL, Mosiagina LI (2002) Vegetarian diet in treating elderly patients with ischemic heart disease (clinico-hemodynamic, biochemical, and hemorheological effects) (Vegetarianskaia dieta v lechenii bol'nykh ishemicheskoi bolezni'u serdtsa pozhilogo vozrasta (kliniko-gemodinamicheskie biokhimicheskie i gemoreologicheskie éffekty)). *Vopr Pitan* 71 (3):11-14
334. Jhatakia KU (1973) Profile of coronary artery disease in vegetarian community. *Indian Heart J* 25 (2):94-99
335. Kolenda KD, Muller MJ (2005) How effective is dietary therapy for secondary prevention in patients with coronary heart disease?. [German] (Wie wirksam ist eine ernahrungstherapie bei patienten mit koronarer herzkrankheit in der sekundarpravention?). *Tagliche Praxis* 46 (2):381-392
336. listed Na (1997) Ornish lifestyle modification program continues to produce impressive outcomes for CHD. *Healthc Demand Dis Manag* 3 (4):59-61
337. Marshall DA, Walizer EM, Vernalis MN (2009) Achievement of heart health characteristics through participation in an intensive lifestyle change program (Coronary Artery Disease Reversal Study). *J Cardiopulm Rehabil Prev* 29 (2):84-96. doi:10.1097/HCR.0b013e31819a00b2
338. Medkova IL, Mosiakina LI, Pavlova VE, Zharkov AP, Bugaev VA, Koryshev VI (1997) Balanced vegetarian diet in combined rehabilitation of patients suffering from ischemic heart disease (Opyt ispol'zovaniia sbalansirovannoi vegetarianskoi diety v kompleksnoi reabilitatsii bol'nykh izhemicheskoi bolezni'u serdtsa). *Klin Med (Mosk)* 75 (1):28-31
339. Medkova IL, Pustynnikova VE, Mosiakina LI, Ieromuzo AA (1997) The results of exposure to an antisclerotic vegetarian diet enriched with soy-based products on patients in the secondary prevention of ischemic heart disease (Rezul'taty vozdeistviia protivoskleroticheskoi vegetarianskoi diety, obogashchennoi produktami pererabotki soi, na bol'nykh pri vtorichnoi profilaktike ishemicheskoi bolezni serdtsa). *Ter Arkh* 69 (9):52-55
340. Misquitta R, Ergas I, Edwards L, Rahbar J, Kushi L (2020) Preliminary evaluation of the health achieved through lifestyle transformation (HALT) program, a kaiser permanente lifestyle intervention. *J Altern Complement Med* 26 (11):A9. doi:<http://dx.doi.org/10.1089/acm.2020.29085.abstracts>
341. Neelamegam V, Veeramani SR, Balasubramanian S, Selvarani G, Ramesh R, Saravanan M, Nagasundar G, Saravanan RR, Sathish Kumar S, Hemanath TR, Sivakumar GS (2019) Clinical and Angiographic Profile of Premenopausal women with STEMI. *Indian Heart J* 71 (Supplement 1):S81. doi:<http://dx.doi.org/10.1016/j.ihj.2019.11.185>
342. Ornish D, Brown SE, Scherwitz LW, Billings JH, Armstrong WT, Ports TA, McLanahan SM, Kirkeeide RL, Brand RJ, Gould KL (1990) Can lifestyle changes reverse coronary heart disease? The Lifestyle Heart Trial. *Lancet (London, England)* 336 (8708):129-133. doi:10.1016/0140-6736(90)91656-u
343. Ornish D, Scherwitz LW, Billings JH, Brown SE, Gould KL, Merritt TA, Sparler S, Armstrong WT, Ports TA, Kirkeeide RL, Hogeboom C, Brand RJ (1998) Intensive lifestyle changes for reversal of coronary heart disease. *JAMA* 280 (23):2001-2007. doi:10.1001/jama.280.23.2001
344. Shah B, Ganguzza L, Slater J, Newman JD, Allen N, Fisher E, Larigakis J, Ujueta F, Gianos E, Guo Y, Woolf K (2017) The Effect of a Vegan versus AHA DiEt in Coronary Artery Disease (EVADE CAD) trial: study design and rationale. *Contemporary clinical trials communications* 8:90-98. doi:10.1016/j.conctc.2017.09.003

345. Rees K, Al-Khudairy L, Takeda A, Stranges S (2019) Vegan dietary pattern for the primary and secondary prevention of cardiovascular diseases. *Cochrane Database Syst Rev* (12):CD013501. doi:<http://dx.doi.org/10.1002/14651858.CD013501>
